Examining the impact of the COVID-19 pandemic on cervical cancer screening practices among clinicians practicing in Federally Qualified Health Centers: A mixed methods study

Lindsay Fuzzell,\* Ph.D.,<sup>1</sup> Paige Lake\*, MPH,<sup>1</sup> Naomi C. Brownstein, Ph.D.,<sup>2</sup> Holly B. Fontenot, Ph.D., ARNP,<sup>3</sup> Ashley Whitmer, MPH, CPH,<sup>1</sup> Alexandra Michel, Ph.D., CNM,<sup>3</sup> McKenzie McIntyre, MPH, CPH,<sup>1</sup> Sarah L. Rossi, MPH,<sup>4</sup> Sidika Kajtezovich, MD,<sup>4</sup> Susan T. Vadaparampil, Ph.D.,<sup>1,5</sup> MPH, Rebecca Perkins, MD, MSc<sup>4</sup>

\*Ms. Lake and Dr. Fuzzell contributed equally as first authors.

Affiliations:

<sup>1</sup>H. Lee Moffitt Cancer Center & Research Institute, Health Outcomes and Behavior

<sup>2</sup>Medical University of South Carolina, Public Health Sciences

<sup>3</sup>University of Hawaii at Manoa, Nancy Atmospera-Walch School of Nursing

<sup>4</sup>Boston University, Chobanian & Avedisian School of Medicine

<sup>5</sup>H. Lee Moffitt Cancer Center & Research Institute, Office of Community Outreach, Engagement, and Equity

The authors are committed to high standards of research reproducibility and transparency. Source data files will be deposited into a public archive upon acceptance of the manuscript. We will deposit our dataset into the Dryad data repository upon acceptance.

## Abstract

**Background:** The COVID-19 pandemic led to reductions in cervical cancer screening and colposcopy. Therefore, in this mixed method study we explored perceived pandemic-related practice changes to cervical cancer screenings in federally qualified health centers.

**Methods:** Between October 2021 and June 2022, a national sample of 148 clinicians completed surveys; a subset (n=13) clinicians completed qualitative interviews. Most (86%) reported reduced cervical cancer screening early in the pandemic, and 28% reported continued reduction in services at the time of survey completion (October 2021- July 2022). Nearly half (45%) reported staff shortages impacting their ability to screen or track patients.

**Results:** Compared to clinicians in OBGYN/Women's health, those in family medicine and other specialties were less likely to report maintaining or increasing screening compared to pre-pandemic. Advanced practice providers (compared to MDs/DOs,) and Hispanic/Latinx/other clinicians (compared to white non-Hispanic) were more likely to report maintaining or increasing screening vs. pre-pandemic. Most (91%) felt that screening using HPV self-sampling would be helpful to address screening backlogs. Qualitative interviews highlighted the impacts of staff shortages and strategies for improvement.

**Conclusions:** Identifying barriers to screening and instituting solutions in federally qualified health centers is critical to preventing cervical cancers among patients at highest risk.

**Funding:** This study was funded by the American Cancer Society, who had no role in the study's design, conduct, or reporting.

## Introduction

Cervical cancer prevention via screening and treatment of pre-invasive disease has dramatically reduced cervical cancer incidence and mortality rates.<sup>1</sup> However, lack of access to screening and treatment services results in geographic, racial/ethnic, and socioeconomic disparities in cervical cancer incidence and mortality.<sup>2-5</sup> A recent study of cervical cancer patients showed that over half were either never screened or were overdue for screening.<sup>6</sup> Lack of screening remains the most common reason why individuals develop cervical cancer in the United States (US) and worldwide. In the US, cervical cancer screening is considered a critical element of preventive healthcare, and the addition of Human Papillomavirus (HPV) testing, along with Pap testing, can improve prevention programs by allowing longer screening intervals for patients testing negative, while providing more precise risk estimates to allow evidence-based management of patients with abnormal screening results.<sup>7-9</sup>

Since the COVID-19 pandemic began in the US in 2020, however, cancer screenings decreased for many cancer types,<sup>10-13</sup> with cervical cancer screening decreasing more than others.<sup>14-16</sup> Early in the pandemic, patient fear of contracting COVID-19 and reduction in non-urgent medical services impacted the ability to perform cervical cancer screening and colposcopy.<sup>17</sup> A survey of 22 federally qualified health centers (FQHCs) that conducted cervical cancer screenings in 2020 found that 90% reported cancelling cervical cancer screenings during the height of the pandemic.<sup>18</sup> While 86% reported rescheduling cancer screenings for future visits, the success of this strategy to maintain screening rates was not measured. FQHCs reported strategies such as switching to telehealth visits and implementing in-office structural changes, new waiting room protocols, and new referral processes to address pandemic restrictions.<sup>18</sup> Following widespread vaccination and the resumption of in person services, cancer screening rates have begun to rebound,<sup>10,19</sup> but challenges still exist. Currently, medical staff shortages and backlogs of patients needing to catch up on preventive services lead to longer wait times for scheduling appointments and decreased screening rates.<sup>13,17,20</sup>

Little work has explored the impact of the COVID-19 pandemic on clinician perceptions of cervical cancer screening and staffing challenges in FQHCs or safety net facilities. Maintaining cancer screening in these facilities is critical as they serve patients at the highest risk for cervical cancer: publicly insured/uninsured, immigrant, and historically marginalized populations.<sup>18,21</sup> This paper examines the association of clinician characteristics with perceived changes in cervical cancer screening and the impact of

pandemic-related staffing changes on screening and abnormal results follow-up during the pandemic period of October 2021 through July 2022 in safety net settings, including FQHCs.

## Methods

### Participant recruitment

Clinicians were eligible to participate if they: 1) performed cervical cancer screening, 2) were a physician or Advanced Practice Provider (APP), and 3) were currently practicing in a federally qualified health center or safety net facility in the United States (US) Between October 2021 and July 2022. We recruited clinicians for participation in the online survey through periodic recruitment email messages via the American Cancer Society Vaccinating Adolescents Against Cancer (VACs) program and the professional networks of the PIs (RBP, STV).

Survey participants were asked if they would also be willing to participate in qualitative interviews via phone. A random sample of those who indicated willingness were contacted for participation. This study was approved by Moffitt Cancer Center's Scientific Review Committee and Institutional Review Board (MCC #20048) and Boston University Medical Center's Institutional Review Board (H-41533). All survey participants viewed an information sheet in lieu of reading and signing an informed consent form, and interview participants provided verbal consent.

### Measures

Quantitative survey questions were developed based on recent literature exploring the effects of the COVID-19 pandemic on cancer screening practices<sup>14,20</sup> and the investigators' clinical observations. The draft survey was reviewed by an expert panel of FQHC providers (n=8), refined, piloted, and finalized after incorporating pilot feedback.

Clinician characteristics assessed included age, race/ethnicity, training, speciality, and geographic region. Age was measured in years and categorized for analysis as <30, 30-39, 40-49, 50+. Gender identity was assessed as male, female, transgender, and other. Race was assessed as Asian, Black/African American, White, Mixed race, Native Hawaiian/Pacific Islander, American Indian/Alaska Native, and Other. Ethnicity was assessed as Hispanic/Latinx or non-Hispanic/Latinx. Race/ethnicity was categorized for analysis as white non-Hispanic versus all others. For all variables assessed in this manuscript that allowed write-in/free responses, responses were re-classified within the pre-determined categories for each variable when possible.

Clinician training was assessed as physician (medical doctor [MD], doctor of osteopathic medicine [DO]) or advanced practice providers (APPs) (physician assistant [PA], nurse practitioner [NP], and certified nurse midwife [CNM]). Clinician training was categorized as: 1) MD/DO and 2) APPs (NPs, CNMs, PAs). Clinical specialty was assessed as Obstetrics and Gynecology (OBGYN), family medicine, internal medicine, pediatric/adolescent medicine, women's health, and other (via write in). Based on prior literature<sup>22</sup> and the number of respondents in each category, we created the following categories for clinician specialty: 1) Women's Health/OBGYN, 2) Family Medicine, and 3) Other. Geographic location included four US regions (Northeast, South, Midwest, West) and a non-responder category for those who did not provide state or zip code. Based on national data indicating geographic variation in coverage rates by US region<sup>2</sup> as well and distribution of respondents, region was categorized as 1) Northeast, 2) South, and 3) West and Midwest.

We also assessed clinical behaviors and attitudes associated with cervical cancer screening. Questions captured the number of screens performed monthly, test(s) used for screening, attitudes toward using self-collected HPV testing for cervical cancer screening, barriers to screening, tracking systems, and staffing changes.

Qualitative interview guide questions were developed based on recent literature<sup>14,20</sup> and the investigators' clinical observations. The draft interview guide was reviewed by an expert panel of FQHC providers (n=8) and revised. Interview questions explored survey topics in depth, including experiences with providing cervical cancer screening at different points during the pandemic, barriers to providing care, as well as strategies for improving follow-up, including tracking systems and self-sampled HPV testing.

## **Data Analysis**

**Quantitative survey data.** We assessed descriptive statistics (frequencies, percentages) of clinician characteristics and outcome variables. We conducted separate exact binary logistic regressions (due to small cell sizes) examining the associations of clinician characteristics with (a) screening practices at the time of survey participation (the same/more versus less than pre-pandemic), and (b) pandemic-associated staffing changes impacting the ability to screen or follow-up (yes/no). The following variables were included in the full models for each outcome: race/ethnicity, age, gender, region, clinician type. We used manual forward selection with a significance value for entry of 0.10. Variables were added sequentially with the variable with the lowest p-value below 0.10 added at each step. Analyses were conducted in SAS version 9.4.

**Qualitative interview data.** Interviews were audio recorded and transcribed verbatim. Data were coded using thematic content analysis.<sup>23,24</sup> Based on the questions in the initial interview guide, a priori codes were developed and a codebook created to operationalize and define each code. The qualitative analysis team independently reviewed the data twice. The team hand coded the data with the initial codes and made notes on possible new codes in the first coding pass. Then, notes on possible new codes were discussed until consensus was reached. The codes were then revised and transcripts reviewed using the updated code categories. This second coding pass served to clean coding from the first coding pass and identify emergent themes not initially identified.<sup>25</sup> At least two coders reviewed each transcript. Discrepancies were resolved by discussion in weekly group meetings. A centralized shared data sheet was used for coding to facilitate communication across different institutions.

### **Role of the Funding Source**

This study was funded by the American Cancer Society, who had no role in the study's design, conduct, or reporting.

## **Results**

### **Quantitative survey data**

A total of 159 potential participants viewed the online study information sheet and completed screening items; 11 were excluded due to ineligible clinical training (n=5) or not conducting cervical cancer screening (n=6). Table 1 details clinician characteristics and screening practices of the final analytic sample (n=148). The sample was primarily female (85%), White (70%), non-Hispanic (86%), and practiced in the Northeast (63%). Most (70%) reported specializing in family medicine, 19% reported Women's Health/OBGYN, and 11% reported other specialties. All but one participant (99%) used Pap/HPV co-testing for routine screening of patients aged 30-65, and 60% performed 10 or fewer screens per month. Most (93%) clinicians determined the next step in management themselves when their patients had abnormal results (rather than refer to a specialist). Most (78%) had colposcopy available on site, though only 31% of participants reported that treatment (Loop Electrosurgical Excision Procedure, [LEEP]) was available on site.

Most (95%) reported decreased screening during 2020 compared to pre-pandemic, and 53% stated that screening services were completely suspended at some point during the pandemic. Smaller proportions reported suspensions of colposcopy (38%) and LEEP (6%) services. By October 2021-July 2022, when the

survey was conducted, screening had recovered somewhat. Approximately one-quarter (28%) reported less cervical cancer screening currently than before the pandemic, 46% reported the same amount, and 26% more screening. Among clinics providing LEEP services, 76% had currently resumed pre-pandemic LEEP capacity (data not shown).

Table 2 details logistic regression model results for clinician and practice characteristics associated with odds of doing the same amount or more cervical cancer screening at the time of survey completion (2021-2022) as compared to before the COVID-19 pandemic. Region, gender, and age were not included in the model after completing the specified variable selection process. Clinician specialty was significantly associated with odds of doing the same or more cervical cancer screening at time of the survey (2021-2022) than before the pandemic ( $p = 0.03$ ). Compared to Women's Health/OBGYNs, those who identified as family medicine clinicians and other were significantly associated with decreased odds of performing the same or more screening at time of survey (2021-22) (Family medicine:  $OR = 0.29$ , 95%  $CI$ : 0.08-1.07,  $p = 0.06$ ; Other:  $OR=0.12$ , 95%  $CI$ : 0.025-0.606,  $p=.01$ ). Further, clinician training was significantly associated with increased odds of doing the same or more screening at time of the survey (2021-2022) as compared to before the pandemic ( $p=.06$ ); compared to MDs/DOs, APPs had higher odds of performing the same or more screening at time of the survey (2021-2022) ( $OR=2.15$ , 95%  $CI$ : 0.967-4.80,  $p=.06$ ). Clinician race/ethnicity was also significantly associated, with Hispanic/Latinx clinicians more likely to report the same or more screening at time of the survey (2021-2022) as compared to white non-Hispanic clinicians ( $OR=2.16$ , 95%  $CI$ : .894-5.21,  $p=.08$ ).

Clinicians reported various barriers to cervical cancer screening (Table 3). Most commonly reported barriers were limited in-person appointment availability (46%) and patients not attending appointments (42%), followed by the switch to telemedicine (33%) and the need to address more pressing health concerns (31%). Another important barrier was pandemic-associated staffing changes impacting the ability to screen for cervical cancer, track abnormal results, or follow-up with their patients, which was reported by 45% of participants. Approximately half of participants reported current decreased staffing levels of medical assistants (56%), and office staff (43%) as compared to pre-pandemic while approximately one third reported decreases in physicians (35%), APPs (28%), and nurses (28%). Only 12% reported lack of health insurance was an important barrier to screening.

Clinician and practice characteristics associated with odds of reporting staff shortages, tracking abnormal results, and follow-up were also assessed using logistic regression. In manual forwards selection, gender, region, age, race/ethnicity, clinician specialty and training were not selected for the final model, indicating no factors significantly associated with staffing shortages.

Table 4 highlights results related to strategies for tracking patient screening and abnormal results. To address missed care during the pandemic, most participants reported scheduling screening at the time of telemedicine visits (74%), performing screening when patients presented for other concerns (61%), and querying electronic medical records (62%). Few (22%) reported extra clinical sessions or extended hours devoted to screening. A minority (20%) reported that they did not have any system to track patients overdue for screening. The most commonly reported tracking systems for screening included the electronic medical record (64%) and dedicated staff members (25%). When asked about management of abnormal screening test results, participants most commonly reported that they (individual provider) were responsible for tracking abnormal results (40%) or they were not aware of a tracking system (38%). When systems were in place, they included: electronic medical record tracking (34%), a dedicated staff member (36%), and paper logs (8%).

HPV self-sampling has been proposed as a method to improve cervical cancer screening rates. Table 5 highlights clinician attitudes towards adopting HPV self-sampling as a strategy. A total of 31% felt that self-sampling would be very helpful and 60% felt it would be somewhat helpful to address pandemic-associated screening deficits. Approximately half (49%) would offer self-sampling only to patients who were unable to complete in-clinic screening, 35% would offer to any patient who preferred to self-sample, 6% would enact self-sampling for all patients, and 5% would not offer self-sampling. The most common perceived benefits of self-sampling were screening patients who had difficulty undergoing speculum exams (26% moderate benefit, 58% large benefit), or screening patients who had access to care issues (34% moderate benefit, 39% large benefit). However, clinicians reported concerns about patients collecting inadequate samples (33% moderate, 33% large concern), not returning specimens in a timely manner (35% moderate, 38% large concern), or not presenting for other primary care services (33% moderate, 31% large concern). Participants were able to add free text to explain their answers in this section. Several participants who expressed concerns about HPV self sampling described negative experiences with poor return rates and inadequate samples in home-based colon cancer screening.



## Qualitative Data

A total of 15 clinicians participated in qualitative interviews. The qualitative sub-sample was primarily female (93%), White (67%), non-Hispanic (100%), and practiced in the Northeast (67%). More than half (53%) were APPs, and 73% specialized in Family Medicine. Three themes emerged in the qualitative analysis including: initial pandemic-associated barriers, ongoing barriers (systems and staffing), facilitators and strategies for catching up on cervical cancer screening (Table 6).

**Initial pandemic-associated barriers.** These initial barriers were related to closing of offices/limiting office visits, patient fear of in-person care, prioritizing acute/urgent health conditions over preventive care, and inability to provide cervical cancer screening during telemedicine visits. In primary care offices, early disruptions were associated with caring for persons with COVID-19: “People working, especially in family medicine, were distributed to the COVID clinic... And so non-essential visits including routine pap smears were put on hold” (APP, Family Medicine). Many clinics switched to telemedicine, which was helpful to address acute issues, but reduced opportunities for cervical cancer screening. One said: “If they had been in the clinic... I would have probably done cervical cancer screening at that time.” This participant noted that rescheduling well care was often unsuccessful: “I’ll have the medical assistant call... but we have a really high no-show rate when people are just coming in for well exams” (APP, Women’s Health).

Clinicians also noted that patients were afraid to come for care early in the pandemic: “Patients were hesitant, especially in the first year of [the] COVID pandemic, to leave their home for unnecessary reasons, including screening tests such as Pap smear” (MD, Family Medicine). Later in the pandemic, when more patients were seen for primary care, clinicians described situations where other medical conditions took priority: “primary care visits were all like trying to catch up on everything else cause all of a sudden now everyone’s diabetes is out of control, and their anxiety is out of control, and cancer screening ends up being at the bottom of the list among the issues that they want to talk about” (MD, Family Medicine). As the pandemic moved into the endemic phase, clinicians described additional challenges: “The social determinants are still hitting some of our patients pretty hard... I don’t know that it’s COVID as much anymore that’s affecting their ability to access care” (MD, Family Medicine).

**Ongoing barriers (system and staffing).** Several participants described current and ongoing limitations to existing systems: “Only if a patient has had an abnormal [result] are they actively being tracked...

[otherwise] until they access the Health Center for their next visit we really have no idea” (APP, Women’s Health/OBGYN). Others described EMR functionality that went unused due to limited staff capacity or poorly functioning EMRs: “In our old system you could literally put a quick text [smart phrase that pulls patient information into a medical record note]... and it will just come up with all the history of the Paps. We can't do any of it in this new system... I'm literally going through the system, and looking at all the past Paps, and I'm writing them in the note” (MD, Family Medicine).

Participants described profound staffing shortages: “We're missing MAs, front desk, providers, nurses too. Pretty much literally everybody, every position, we're short” (APP, Family Medicine). Another said: “We stayed [open] without somebody cleaning the clinic 100%... so we had to do some of the work ourselves” (MD, Family Medicine). Staffing shortages also negatively impacted outreach: “We're not outreaching to patients and trying to get them in, we're just trying to get through the day... we just don't have the manpower to see everybody” (APP, Family Medicine). The relatively lower compensation at FQHCs posed an additional challenge both to staff retention and to creating and utilizing patient tracking systems: “As a federally qualified health center, we often are not the best payer for different roles. And so we tend to have a lot of turnover, particularly in our medical assistants, nurses, and it's quite hard to hire.” Additionally, this participant also noted, “We also tend not to have the biggest or the most robust IT department... And any time we need to get information from these registries, we need to ask our IT department. But they're pretty understaffed. And also underpaid” (MD, Family Medicine). Childcare also posed challenges: “I'd say the majority of our staff in the nursing and medical assistant roles are moms and some of them are single moms. So we lost a few because... they had no childcare [reacted to the pandemic] or they couldn't come in” (APP, Family Medicine). In contrast, COVID-19 vaccine mandates were not felt to be significant contributors to staff shortages.

**Facilitators and strategies for catching up on cervical cancer screening.** The participants discussed how the availability of COVID-19 vaccinations shifted the risk-benefit ratio of seeing patients in person for routine care: “before we were able to be vaccinated... it felt like unnecessary risk” (APP, Women’s Health). As the pandemic continued into its second year, clinicians perceived the benefits of resuming in person visits outweighed the risk of contracting COVID-19 in healthcare settings; therefore, the focus shifted to catch-up measures: “When we realized that this was gonna be a long-term change... there was a big push to catch people up [with screening for cervical cancer]” (APP, Family Medicine).

Participants discussed strategies for patient outreach to catch-up on screening, including automated components within the EMR, dedicated staff who identify patients who are due to screen, providing evening or weekend hours, and mobile health units. One noted, “The health center as a whole has been trying to run lists of people that are due and bring them in” (APP, Family Medicine). Another described clinician incentive strategies for facilitated tracking and catching up patients on screening: “We're an accountable care organization, it incentivizes getting all of your quality metrics where you want them... The pap smears are tracked every quarter... If you hit above 75% of your pap smears, they give you a incentive quarterly” (APP, Family Medicine). Another suggested that healthcare systems and insurance plans could be utilized: “We [our practice] discussed perhaps using our accountable entity to try to do some outreach as well, because they do outreach right now for colon cancer and mammograms” (MD, Family Medicine).

Some participants described potential strategies to increase staff retention: “Increase in pay I feel will help. But also recognition for the staff, because some of the staff feel under appreciated.... and maybe more organized so that everything can run smoothly and uniformly” (APP, Family Medicine). Another added: “Better salaries, better benefits, better working conditions. In the sense that if somebody needed to take care of a child and go home early, then staggered staffing, flexible hours as part of the benefits, so that somebody else can cover. And, of course, monetary, icing on the cake, so to speak, always works” (MD, OBGYN).

Self-sampling for HPV testing is not currently FDA approved in the US, but may be an option in the future. Most participants thought self-sampling would be helpful to address pandemic-related screening deficits: “People are coming back with a lot of problems that they've been hanging on to for a couple of years. So that could help take care of some of their health maintenance and not further delay it because they're worried about X, Y, Z also. Then sure, that would help with the COVID deficit specifically” (APP, Family Medicine). Many noted that patients self-collected other specimens, and felt that HPV self-collection would be feasible: “We have a lot of our patients doing self-swabs right now anyways for vaginitis... and I'm used to having patients swab themselves for other things like in pregnancy we do GBS swabs, so I feel confident that people can correctly be instructed on how to self-swab” (APP, OBGYN). However, others were concerned about patients' abilities to properly collect the specimens: “There's certain populations, especially the underserved community that I do work in might face challenges to follow the instruction or even read on how to do it” (MD/DO, Family Medicine). Others described negative experiences using mailing for self-collected colon

cancer screening: “It would be really clever if we could just send out swabs to patients. But I don't know. We tried that with FIT (fecal occult blood) testing, and we were told by the lab that they don't get a high enough return of the kits. And so it actually was cost prohibitive to just be sending out FIT tests” (MD/DO, Family Medicine).

## Discussion

We examined patterns of cervical cancer screening provision and abnormal results follow-up between October 2021 through July 2022 among clinicians practicing in federally qualified health centers. Over 80% of clinicians reported decreased screening during the start of the pandemic in 2020, but approximately 67% reported that screening had resumed to pre-pandemic levels at the time of the survey (2021-2022). Those who identified speciality as family medicine or other had decreased odds for, and those who identified training as APP, had increase odds for performing the same or more screening at time of survey (2021-22) as compared to before the pandemic. Clinician barriers, both reported quantitatively and qualitatively, focused on staffing shortages as well as structural systems to track and reestablish care for those who were overdue for screening and those who needed follow-up after an abnormal screening test.

Barriers to screening evolved over the course of the pandemic. In 2020, fear of contracting COVID was the primary barrier to provision of services by clinicians and health systems, and use of services by patients. Clinicians described near cessation of cervical cancer screening services early in the pandemic, as both clinicians and patients felt that the risk of contracting COVID when providing well care outweighed the benefits of cervical cancer screening in the short term. Vaccinations and the realization that COVID was becoming endemic changed this calculus, and clinics began re-opening services and recalling patients for screenings. In 2021/22, the primary barrier to cervical cancer screening shifted from contagion concerns to staffing shortages and the need for primary care clinicians to address other chronic health conditions. Quantitative findings indicated that cancer screenings were less often performed in specialties that did not focus on women's health, such as internal or family medicine. Qualitative data indicated that this may have resulted from a need to provide direct care for COVID-19 patients or to focus on other chronic health conditions that had worsened due to lack of care during 2020.<sup>26-28</sup> In addition, our findings noted that APPs performed more cervical cancer screening than physicians, which could indicate appropriate allocation of patients needing preventive care to

APPs, while assigning sicker patients to physicians who could better address complex medical concerns.

Additional research is needed to confirm and further explore these findings.

Staff shortages hindering the ability to provide cervical cancer screening and followup care were reported by nearly half of clinicians. Clinicians reported reductions in staffing at all levels: physicians/APPs, nurses, medical assistants, and front desk staff. Two factors were felt to be the most important contributors to staff shortages: low salaries and lack of childcare. Because FHQCs typically pay lower salaries than other practice settings,<sup>29,30</sup> participants reported high levels of staff turnover and difficulties with recruitment. Pandemic-related remote schooling and rules related to infection control created childcare difficulties for many parents. Participants reported this to be a particular problem for female staff in lower salaried positions, such as medical assistants.<sup>31,32</sup>

Strategies for addressing pandemic-related screening deficiencies included improving staffing levels as well as systems for follow-up and tracking. Several clinicians described success associated with robust tracking systems including population management reports, system-wide incentives, automated patient outreach, and dedicated staff for patient recall and scheduling. Others, however, reported absent systems or being unable to utilize EMR capabilities due to staff shortages. Higher salaries, improved organization within the healthcare system, and ensuring that staff felt respected and valued by leadership were felt to be important strategies for improving care provision.<sup>33-36</sup>

Participants overall felt that HPV self-sampling would be a useful tool to address pandemic-related screening deficits, as has been noted in the literature.<sup>37</sup> Many felt confident that patients could self-collect the swabs given their experience using self-swabbing with patients for vaginitis or group B strep in pregnancy. However, others were concerned that patients might not collect the specimen properly, leading to a false negative cancer screening result. Self-sampling when using PCR-based testing has demonstrated overall similar accuracy to clinician-based samples,<sup>38</sup> though studies to validate this in US populations are ongoing.<sup>39</sup> For some participants, clinic-collected sampling was viewed more favorably than home-testing via mailed kits due to negative experiences with home-based colon cancer testing. A meta-analysis of self-sampling indicated increased screening participation when self-sampling is offered, with clinic-based offering being more effective than mail-in kits.<sup>40</sup>

As healthcare continues to face challenges including COVID-19, influenza, behavioral health, and exacerbation of chronic diseases, strategies are needed to ensure that patients are provided with cervical cancer prevention services. This is especially important in FQHCs and safety net settings, who serve patients at the highest risk of invasive cervical cancer.<sup>41-45</sup> Maintaining adequate staffing is a critical need noted in our study and by others.<sup>46</sup> Higher salaries were felt to be most important, as well as improved organization of clinic function and flexible scheduling to support working parents with childcare needs.<sup>47,48</sup>

This study has several strengths and weaknesses. We surveyed clinicians practicing in FQHCs or safety net facilities in the US on the perceived impact of the pandemic on screening and abnormal results follow-up. Few investigations thus far have examined perceptions of those practicing in FQHCs, in particular as it pertains to impacts of pandemic-related challenges to cervical cancer screening. Despite this, we note several limitations. We recruited our sample through FQHC networks; thus, we were unable to calculate a response rate, nor were we able to achieve a nationally representative sample. Notwithstanding efforts to achieve a regionally diverse sample, 63% of responding clinicians were practicing in the Northeast at the time of their participation. Given that COVID-19 policies varied widely by state, this regional imbalance may limit the generalizability of our results. Despite the oversample of clinicians in the Northeast, region was not a significant predictor of either outcome. Importantly, we do not have data on the overall number of screenings provided by each FQHC. The majority of our sample reported that they personally were providing screening at pre-pandemic levels, but half also report staff shortages impacting screening and follow up. Therefore we cannot confirm whether the efforts of remaining staff are sufficient to compensate for missing personnel in terms of the overall availability of services.

These findings highlight that in late 2021 and early 2022, clinicians in FQHCs and safety net facilities are still perceiving impacts of the pandemic broadly to cervical cancer screening. They also still report experiencing pandemic-related impacts of staffing changes on screening and follow-up. If not addressed, reductions in screening due to staff shortages, and low patient engagement with the healthcare system may lead to increase in cervical cancer in the short and long term. Future research should closely track FQHC trends in provision of screening, colposcopy, and treatment services in order to avoid future increases in cancer incidence.

## **Acknowledgements**

The authors would like to acknowledge Moffitt Cancer Center's Biostatistics and Bioinformatics Shared Resource (BBSR).

## References

1. Sawaya GF, Huchko MJ. Cervical Cancer Screening. *Med Clin North Am*. Jul 2017;101(4):743-753. doi:10.1016/j.mcna.2017.03.006
2. Buskwofie A, David-West G, Clare CA. A Review of Cervical Cancer: Incidence and Disparities. *J Natl Med Assoc*. Apr 2020;112(2):229-232. doi:10.1016/j.jnma.2020.03.002
3. Vu M, Yu J, Awolude OA, Chuang L. Cervical cancer worldwide. *Curr Probl Cancer*. Sep 2018;42(5):457-465. doi:10.1016/j.currproblcancer.2018.06.003
4. Chen HY, Kessler CL, Mori N, Chauhan SP. Cervical cancer screening in the United States, 1993-2010: characteristics of women who are never screened. *J Womens Health (Larchmt)*. Nov 2012;21(11):1132-8. doi:10.1089/jwh.2011.3418
5. Akers AY, Newmann SJ, Smith JS. Factors underlying disparities in cervical cancer incidence, screening, and treatment in the United States. *Curr Probl Cancer*. May-Jun 2007;31(3):157-81. doi:10.1016/j.currproblcancer.2007.01.001
6. Benard VB, Jackson JE, Greek A, et al. A population study of screening history and diagnostic outcomes of women with invasive cervical cancer. *Cancer Med*. Jun 2021;10(12):4127-4137. doi:10.1002/cam4.3951
7. Schiffman M, Wentzensen N, Wacholder S, Kinney W, Gage JC, Castle PE. Human papillomavirus testing in the prevention of cervical cancer. *Journal of the National cancer institute*. 2011;103(5):368-383.
8. Leinonen M, Nieminen P, Kotaniemi-Talonen L, et al. Age-specific evaluation of primary human papillomavirus screening vs conventional cytology in a randomized setting. *J Natl Cancer Inst*. Dec 2009;101(23):1612-23. doi:10.1093/jnci/djp367
9. Mayrand MH, Duarte-Franco E, Rodrigues I, et al. Human papillomavirus DNA versus Papanicolaou screening tests for cervical cancer. *N Engl J Med*. Oct 18 2007;357(16):1579-88. doi:10.1056/NEJMoa071430
10. Chen RC, Haynes K, Du S, Barron J, Katz AJ. Association of cancer screening deficit in the United States with the COVID-19 pandemic. *JAMA oncology*. 2021;7(6):878-884.
11. Poljak M, Cuschieri K, Waheed D, Baay M, Vorsters A. Impact of the COVID-19 pandemic on human papillomavirus-based testing services to support cervical cancer screening. *Acta Dermatovenerol Alp Pannonica Adriat*. 2021;30(1):21-26.
12. Amram O, Amiri S, Robison J, Pflugeisen CM, Monsivais P. COVID-19 and inequities in colorectal and cervical cancer screening and diagnosis in Washington State. *Cancer Medicine*. 2022;
13. Smith DL, Perkins RB. Low rates of HPV vaccination and cervical cancer screening: Challenges and opportunities in the context of the COVID-19 pandemic. *Preventive Medicine*. 2022;159:107070.
14. Miller MJ, Xu L, Qin J, et al. Impact of COVID-19 on cervical cancer screening rates among women aged 21–65 years in a large integrated health care system—Southern California, January 1–September 30, 2019, and January 1–September 30, 2020. *Morbidity and Mortality Weekly Report*. 2021;70(4):109.
15. Mayo M, Potugari B, Bzeih R, Scheidel C, Carrera C, Shellenberger RA. Cancer screening during the COVID-19 pandemic: A systematic review and meta-analysis. *Mayo Clinic Proceedings: Innovations, Quality & Outcomes*. 2021;5(6):1109-1117.
16. Fedewa SA, Star J, Bandi P, et al. Changes in Cancer Screening in the US During the COVID-19 Pandemic. *JAMA Network Open*. 2022;5(6):e2215490-e2215490.
17. Massad LS. Impacts of the COVID-19 pandemic on cervical cancer will be severe. *BJOG: An International Journal of Obstetrics & Gynaecology*. 2022;129(7):1140-1140.
18. Fisher-Borne M, Isher-Witt J, Comstock S, Perkins RB. Understanding COVID-19 impact on cervical, breast, and colorectal cancer screening among federally qualified healthcare centers participating in “Back on track with screening” quality improvement projects. *Preventive Medicine*. 2021;151:106681.
19. McBain RK, Cantor JH, Jena AB, Pera MF, Bravata DM, Whaley CM. Decline and rebound in routine cancer screening rates during the COVID-19 pandemic. *Journal of General Internal Medicine*. 2021;36(6):1829-1831.



20. Wentzensen N, Clarke MA, Perkins RB. Impact of COVID-19 on cervical cancer screening: Challenges and opportunities to improving resilience and reduce disparities. *Preventive Medicine*. 2021;151:106596.
21. Adams SA, Haynes VE, Brandt HM, et al. Cervical cancer screening behaviors and proximity to federally qualified health centers in South Carolina. *Cancer Epidemiol*. Apr 2020;65:101681. doi:10.1016/j.canep.2020.101681
22. Neugut AI, MacLean SA, Dai WF, Jacobson JS. Physician characteristics and decisions regarding cancer screening: a systematic review. *Population Health Management*. 2019;22(1):48-62.
23. Elo S, Kyngäs H. The qualitative content analysis process. *Journal of advanced nursing*. 2008;62(1):107-115.
24. Elo S, Kyngas H. The qualitative content analysis process. *J Adv Nurs*. Apr 2008;62(1):107-15. doi:10.1111/j.1365-2648.2007.04569.x
25. Krueger R, ed. *Moderating focus groups*. Sage; 1998. Morgan DL KRE, ed. *The Focus Group Kit*.
26. Amit M, Tam S, Bader T, Sorkin A, Benov A. Pausing cancer screening during the severe acute respiratory syndrome coronavirus 2 pandemic: Should we revisit the recommendations? *Eur J Cancer*. Jul 2020;134:86-89. doi:10.1016/j.ejca.2020.04.016
27. Castanon A, Rebolj M, Pesola F, Sasieni P. Recovery strategies following COVID-19 disruption to cervical cancer screening and their impact on excess diagnoses. *Br J Cancer*. Apr 2021;124(8):1361-1365. doi:10.1038/s41416-021-01275-3
28. Network EHR. Preventive cancer screenings during COVID-19 pandemic. 2020;
29. Friedberg MW, Reid RO, Timbie JW, et al. Federally Qualified Health Center Clinicians And Staff Increasingly Dissatisfied With Workplace Conditions. *Health Aff (Millwood)*. Aug 1 2017;36(8):1469-1475. doi:10.1377/hlthaff.2017.0205
30. Quinn MT, Gunter KE, Nocon RS, et al. Undergoing transformation to the patient centered medical home in safety net health centers: perspectives from the front lines. *Ethn Dis*. Summer 2013;23(3):356-62.
31. Boesch D, Hamm K. Valuing women's caregiving during and after the coronavirus crisis. *Center for American Progress* <https://www.americanprogress.org/issues/women/reports/2020/06/03/485855/valuing-womens-caregiving-coronavirus-crisis>. 2020;
32. Organisation for Economic Co-operation and Development. Caregiving in crisis: Gender inequality in paid and unpaid work during COVID-19. <https://www.oecd.org/coronavirus/policy-responses/caregiving-in-crisis-gender-inequality-in-paid-and-unpaid-work-during-covid-19-3555d164/>
33. Prasad K, McLoughlin C, Stillman M, et al. Prevalence and correlates of stress and burnout among US healthcare workers during the COVID-19 pandemic: A national cross-sectional survey study. *EClinicalMedicine*. 2021;35:100879.
34. Serrano J, Hassamal S, Hassamal S, Dong F, Neeki M. Depression and anxiety prevalence in nursing staff during the COVID-19 pandemic. *Nursing Management*. 2021;52(6):24.
35. Sinsky CA, Brown RL, Stillman MJ, Linzer M. COVID-related stress and work intentions in a sample of US health care workers. *Mayo Clinic Proceedings: Innovations, Quality & Outcomes*. 2021;5(6):1165-1173.
36. Talbot S, Dean, W. . Physicians aren't 'burning out.' they're suffering from moral injury. <https://www.statnews.com/2018/07/26/physicians-not-burning-out-they-are-suffering-moral-injury/>
37. Fuzzell LN, Perkins RB, Christy SM, Lake PW, Vadaparampil ST. Cervical cancer screening in the United States: Challenges and potential solutions for underscreened groups. *Preventive Medicine*. 2021;144:106400.
38. Arbyn M, Simon M, de Sanjosé S, et al. Accuracy and effectiveness of HPV mRNA testing in cervical cancer screening: a systematic review and meta-analysis. *The Lancet Oncology*. 2022;
39. National Cancer Institute. NCI Cervical Cancer 'Last Mile' Initiative,. <https://prevention.cancer.gov/major-programs/nci-cervical-cancer-last-mile-initiative>
40. Costa S, Verberckmoes B, Castle PE, Arbyn M. Offering HPV self-sampling kits: an updated meta-analysis of the effectiveness of strategies to increase participation in cervical cancer screening. *British Journal of Cancer*. 2022:1-9.
41. Hébert JR, Adams SA, Ureda JR, et al. Accelerating Research Collaborations Between Academia and Federally Qualified Health Centers: Suggestions Shaped by History. *Public Health Rep*. Jan/Feb 2018;133(1):22-28. doi:10.1177/0033354917742127

42. Singh GK, Miller BA, Hankey BF, Edwards BK. Persistent area socioeconomic disparities in U.S. incidence of cervical cancer, mortality, stage, and survival, 1975-2000. *Cancer*. Sep 1 2004;101(5):1051-7. doi:10.1002/cncr.20467
43. Barry J, Breen N. The importance of place of residence in predicting late-stage diagnosis of breast or cervical cancer. *Health Place*. Mar 2005;11(1):15-29. doi:10.1016/j.healthplace.2003.12.002
44. Friedman DB, Young VM, Freedman DA, et al. Reducing cancer disparities through innovative partnerships: a collaboration of the South Carolina Cancer Prevention and Control Research Network and Federally Qualified Health Centers. *J Cancer Educ*. Mar 2012;27(1):59-61. doi:10.1007/s13187-011-0272-5
45. Bradley CJ, Given CW, Roberts C. Disparities in cancer diagnosis and survival. *Cancer*. Jan 1 2001;91(1):178-88. doi:10.1002/1097-0142(20010101)91:1<178::aid-cncr23>3.0.co;2-s
46. Frogner BK, Dill JS. Tracking turnover among health care workers during the COVID-19 pandemic: a cross-sectional study. *American Medical Association*; 2022:e220371-e220371.
47. Burrowes S., Casey SM., Pierre-Joseph N., et al. COVID-19 pandemic impacts on mental health, burnout, and longevity among healthcare workers: a mixed methods study. Under review;
48. U.S. Bureau of Cancer Statistics. Quits levels and rates by industry and region, seasonally adjusted. <https://www.bls.gov/news.release/jolts.t04.htm>

Table 1. Clinician characteristics and screening practices

| Variable                                                                            | Frequency        | %    | Valid N |
|-------------------------------------------------------------------------------------|------------------|------|---------|
| <b>Clinician characteristics</b>                                                    |                  |      |         |
| <b>Age</b>                                                                          |                  |      | 148     |
| Less than 30                                                                        | 20               | 13   |         |
| 30 to 39                                                                            | 56               | 38   |         |
| 40 to 49                                                                            | 36               | 24   |         |
| 50+                                                                                 | 35               | 24   |         |
| <b>Gender identity</b>                                                              |                  |      |         |
| Female <sup>1</sup>                                                                 | 125              | 85   | 148     |
| Male                                                                                | 22               | 15   |         |
| Transgender/gender non-binary                                                       | 1                | 0.67 |         |
| <b>Race</b>                                                                         |                  |      | 148     |
| Asian                                                                               | 13               | 9    |         |
| Black/African American                                                              | 15               | 10   |         |
| Mixed race                                                                          | 10               | 7    |         |
| Other                                                                               | 7                | 5    |         |
| White                                                                               | 103              | 70   |         |
| <b>Ethnicity</b>                                                                    |                  |      | 148     |
| Hispanic/Latinx                                                                     | 21               | 14   |         |
| Not Hispanic/Latinx                                                                 | 127              | 86   |         |
| <b>Clinician Training</b>                                                           |                  |      | 148     |
| MD and DO                                                                           | 67               | 45   |         |
| <u>APPs: NPs, CNMs, PAs, other</u>                                                  | 81               | 55   |         |
| <b>Clinician Specialty</b>                                                          |                  |      | 148     |
| Women's Health and Ob/GYN                                                           | 28               | 19   |         |
| Family Medicine                                                                     | 103              | 70   |         |
| Internal Medicine, Pediatric/Adolescent Medicine, and 'other'                       | 17               | 11   |         |
| <b>Region</b>                                                                       |                  |      | 148     |
| Northeast                                                                           | 93               | 63   |         |
| South                                                                               | 28               | 19   |         |
| West & Midwest                                                                      | 26               | 18   |         |
| Non-responders                                                                      | 1                | 0.7  |         |
| <b>Current number of cervical cancer screenings performed per month</b>             |                  |      |         |
| 1-10                                                                                | 90               | 61   |         |
| 11-20                                                                               | 27               | 18   |         |
| >20                                                                                 | 31               | 21   |         |
| <b>Pap/HPV co-testing as screening method for patients aged 30-65</b>               | 147 <sup>2</sup> | 99   | 148     |
| <b>Respondent determines management following abnormal results (yes)</b>            | 138              | 93   | 148     |
| <b>Health center provides colposcopy on site (yes)</b>                              | 115              | 78   | 148     |
| <b>Health center provides treatment (LEEP) on site (yes)</b>                        | 46               | 31   | 148     |
| <b>PANDEMIC IMPACT ON SCREENING, MANAGEMENT, AND STAFFING</b>                       |                  |      |         |
| <b>Screening in 2020 compared to pre-pandemic (less)<sup>3</sup></b>                | 127              | 95   | 134     |
| <b>Screening services stopped at any time during the pandemic (yes)<sup>3</sup></b> | 66               | 53   | 125     |

|                                                                                     |    |    |     |
|-------------------------------------------------------------------------------------|----|----|-----|
| <b>Colposcopy services stopped at anytime during the pandemic (yes)<sup>3</sup></b> | 36 | 38 | 95  |
| <b>LEEP services stopped at anytime during the pandemic (yes)<sup>3</sup></b>       | 8  | 6  | 127 |
| <b>Screening in 2021/now compared to pre-pandemic<sup>3</sup></b>                   |    |    | 140 |
| Less                                                                                | 39 | 28 |     |
| Same                                                                                | 65 | 46 |     |
| More                                                                                | 36 | 26 |     |

<sup>1</sup> Due to small numbers, transgender/non-binary/other were unable to be analyzed as their own category. They were assigned to female for regression analyses because female was the most common response. No difference was noted when grouped with male.

<sup>2</sup> The remaining respondent used primary HPV testing. No respondents in this sample used cytology alone.

<sup>3</sup> Participants who selected “unsure” were excluded from the denominator. 14 (9%) participants were unsure whether screening was less in 2020 compared to pre-pandemic, 23 (16%) were unsure whether screening services were stopped at any time, 53 participants (36%) were unsure whether colposcopy practices were stopped, 21 (14%) were unsure whether LEEP services were stopped, and 8 (5%) were unsure whether they were screening more or less in 2021/now compared to pre-pandemic.

Table 2. Final model of clinician and practice characteristics associated with odds of reporting conducting the same amount or more cervical cancer screening now/in 2021 than before the COVID-19 pandemic (N=140). Manual forwards selection was utilized and the following variables were not selected for the final model ( $p > .10$ ): 1) region 2) gender and 3) age.

|                                 | Overall <i>p</i> | <i>B</i> | <i>SE</i> | Odds ratio | <i>p</i>     | <i>CI</i> |
|---------------------------------|------------------|----------|-----------|------------|--------------|-----------|
| <b>Clinician training</b>       | <b>.0605</b>     |          |           |            |              |           |
| APPs: NP, CNM, PA, other        |                  | .7676    | .4089     | 2.15       | <b>.0605</b> | .967-4.80 |
| MD/DO                           |                  | -        | -         | -          | -            | -         |
| <b>Clinician specialty</b>      | <b>.0364</b>     |          |           |            |              |           |
| Family Medicine                 |                  | -1.22    | .6594     | .295       | <b>.0640</b> | .081-1.07 |
| Int. Med., Peds/Adol. Med.      |                  | -2.09    | .8159     | .123       | <b>.0101</b> | .025-.606 |
| Women’s Health/OBGYN            |                  | -        | -         | -          | -            | -         |
| <b>Clinician race/ethnicity</b> | <b>.0873</b>     |          |           |            |              |           |
| Hispanic/Latinx                 |                  | .7694    | .4500     | 2.16       | <b>.0873</b> | .894-5.21 |
| White non-Hispanic              |                  | -        | -         | -          | -            | -         |

\**CI reported is for OR*

Table 3. Barriers to cervical cancer screening and strategies for tracking patients

| <b>BARRIERS</b>                                                                                           | Rarely<br>n (%) | Sometimes<br>n (%) | Often<br>n (%) | Unsure<br>n (%) | Valid N |
|-----------------------------------------------------------------------------------------------------------|-----------------|--------------------|----------------|-----------------|---------|
| <b>Systems barriers</b>                                                                                   |                 |                    |                |                 | 148     |
| Limited in-person appointment availability at our health center                                           | 24 (16)         | 53 (36)            | 66 (45)        | 5 (3)           |         |
| Patients not scheduling appointments                                                                      | 5 (3)           | 50 (34)            | 85 (57)        | 8 (6)           |         |
| Patients not attending appointments (no shows)                                                            | 8 (6)           | 73 (49)            | 62 (42)        | 5 (3)           |         |
| Patient lack of health insurance or limited coverage <sup>1</sup>                                         | 83 (56)         | 36 (24)            | 18 (12)        | 11 (8)          |         |
| Inability to track patients who are due for screening                                                     | 58 (39)         | 46 (31)            | 32 (22)        | 12 (8)          |         |
| Health center (or providers) not prioritizing screening due to need to address more acute health problems | 34 (23)         | 61 (41)            | 46 (31)        | 7 (5)           |         |
| Switched to telemedicine visits so screening not available                                                | 34 (23)         | 59 (40)            | 48 (33)        | 6 (4)           |         |
| <b>Staffing barriers</b>                                                                                  | Frequency       |                    | Percent        |                 | 148     |
| COVID-related staffing changes impacted ability to screen or track abnormal results (yes)                 | 67              |                    | 45             |                 |         |

| Current health center staffing compared to pre-pandemic                                            | Decreased n (%) | Stayed the same n (%) | Increased n (%) | Unsure n (%) | 148 |
|----------------------------------------------------------------------------------------------------|-----------------|-----------------------|-----------------|--------------|-----|
| Physician (MD, DO)                                                                                 | 52 (35)         | 80 (54)               | 6 (4)           | 10 (7)       |     |
| Nurse practitioner, Physician Assistant, Certified Nurse Midwife, other Advanced Practice Provider | 42 (28)         | 71 (48)               | 22 (15)         | 13 (9)       |     |
| Nurse (RN, LPN)                                                                                    | 42 (28)         | 71 (48)               | 22 (15)         | 13 (9)       |     |
| Medical Assistant                                                                                  | 83 (56)         | 45 (30)               | 8 (6)           | 12 (8)       |     |
| Office Staff                                                                                       | 64 (43)         | 64 (43)               | 6 (4)           | 14 (10)      |     |

<sup>1</sup> Participants were also asked what proportion of patients were unable to obtain treatment (LEEP) due to financial issues, 70% (n=102) answered 0-20%.

Table 4. Strategies for tracking patients and catching up on missed screenings\*

| STRATEGIES                                                                                                                         | Frequency | Percent | Valid N |
|------------------------------------------------------------------------------------------------------------------------------------|-----------|---------|---------|
| <b>Policies or plans for catching up on screenings that were missed due to the pandemic</b>                                        |           |         | 148     |
| Patients seen via telemedicine are scheduled for future screening visits                                                           | 110       | 74      |         |
| Electronic medical record is queried to identify patients who are overdue                                                          | 92        | 62      |         |
| Added dedicated cervical cancer screening days/hours                                                                               | 32        | 22      |         |
| Try to perform cervical cancer screening at acute problem visits/take advantage of opportunities to screen during unrelated visits | 90        | 61      |         |
| <b>System for tracking patients overdue for screening</b>                                                                          |           |         | 148     |
| No, unaware of any system                                                                                                          | 29        | 20      |         |
| Paper log of patients                                                                                                              | 5         | 3       |         |
| Each dept. has its own system                                                                                                      | 5         | 3       |         |
| Electronic medical record tracker                                                                                                  | 94        | 63      |         |
| Dedicated staff person/team member to review records and contact patients                                                          | 37        | 25      |         |
| Other                                                                                                                              | 16        | 11      |         |
| <b>System for tracking abnormal results (e.g., colposcopy referrals)</b>                                                           |           |         | 148     |
| Paper log of patients                                                                                                              | 8         | 5       |         |
| Each dept. has its own system                                                                                                      | 7         | 5       |         |
| I am not aware of any system/each provider tracks own results                                                                      | 56        | 38      |         |
| Electronic medical record tracker                                                                                                  | 50        | 34      |         |
| Dedicated staff person to review records and contact patients                                                                      | 53        | 36      |         |
| Other                                                                                                                              | 16        | 11      |         |

\*Note, participants were asked to check all that apply therefore answers sum to >100%

| Table 5. HPV self-sampling perceptions and practices                                                        |           |    |         |
|-------------------------------------------------------------------------------------------------------------|-----------|----|---------|
|                                                                                                             | Frequency | %  | Valid N |
| <b>Helpfulness of HPV self-sampling to catch up patients overdue for screening due to COVID-19 pandemic</b> |           |    | 147     |
| Not helpful                                                                                                 | 12        | 8  |         |
| Somewhat helpful                                                                                            | 89        | 61 |         |
| Very helpful                                                                                                | 46        | 31 |         |

|                                                                                                                                                                            |                        |                        |                           |                        |     |
|----------------------------------------------------------------------------------------------------------------------------------------------------------------------------|------------------------|------------------------|---------------------------|------------------------|-----|
| <b>Would recommend HPV self-sampling instead of clinician-collected sample for cervical cancer screening</b>                                                               |                        |                        |                           |                        | 148 |
| All patients                                                                                                                                                               |                        | 9                      |                           | 6                      |     |
| Any patient who preferred a self-sample over a clinician-collected sample                                                                                                  |                        | 52                     |                           | 35                     |     |
| Only pts. who couldn't have screening in clinic because of transportation issues, fear of coming to clinic, difficulty with speculum exams                                 |                        | 72                     |                           | 49                     |     |
| N/A I would not offer HPV self-sampling                                                                                                                                    |                        | 8                      |                           | 5                      |     |
| Other                                                                                                                                                                      |                        | 7                      |                           | 5                      |     |
| <b>Location to perform self-sample HPV tests</b>                                                                                                                           |                        |                        |                           |                        | 148 |
| In clinic                                                                                                                                                                  |                        | 8                      |                           | 6                      |     |
| At home                                                                                                                                                                    |                        | 9                      |                           | 6                      |     |
| Either in clinic or home, depending on pt. preference                                                                                                                      |                        | 120                    |                           | 86                     |     |
| Other                                                                                                                                                                      |                        | 3                      |                           | 2                      |     |
| <b>Benefits/advantages of self-sampled HPV testing</b>                                                                                                                     | Not a benefit<br>n (%) | Small benefit<br>n (%) | Moderate benefit<br>n (%) | Large benefit<br>n (%) | 147 |
| Screen patients who have difficulty accessing screening due to lack of qualified providers, distance to clinic, or logistical barriers (e.g., childcare or work schedules) | 7 (5)                  | 32 (22)                | 50 (34)                   | 58 (39)                |     |
| Screen patients via telemedicine                                                                                                                                           | 10 (7)                 | 50 (34)                | 44 (30)                   | 43 (29)                |     |
| Screen patients who would prefer not to have speculum exams (e.g., mobility issues or history of trauma)                                                                   | 3 (2)                  | 23 (16)                | 38 (26)                   | 83 (56)                |     |
| <b>Concerns about self-sampled HPV testing</b>                                                                                                                             | Not a concern          | Small concern          | Moderate concern          | Large concern          | 147 |
| A pelvic exam by a clinician should be part of cervical cancer screening                                                                                                   | 20 (13)                | 57 (39)                | 38 (26)                   | 32 (22)                |     |
| Patients may not collect adequate specimens                                                                                                                                | 4 (3)                  | 45 (31)                | 49 (33)                   | 49 (33)                |     |
| Patient may not return specimen in a timely manner                                                                                                                         | 3 (2)                  | 37 (25)                | 51 (35)                   | 56 (38)                |     |
| If performed at home, patients may not present for routine primary care or follow-up for abnormal test results                                                             | 13 (9)                 | 39 (27)                | 49 (33)                   | 46 (31)                |     |

Table 6. Qualitative themes with exemplar quotes.

| Theme                                       | Exemplar quotes                                                                                                                                                                                                                                                                                                       |
|---------------------------------------------|-----------------------------------------------------------------------------------------------------------------------------------------------------------------------------------------------------------------------------------------------------------------------------------------------------------------------|
| <b>Initial pandemic-associated barriers</b> | <p>"I would say it definitely disrupted all the cancer screenings, the mammo[gram]'s, the colonoscopies, the pap smears, I would say for the whole year of 2020 into about March of 2021." (APP, Family Medicine)</p> <p>"We were only doing acute visits... everything else was by phone." (MD, Family Medicine)</p> |

|                                                                                        |                                                                                                                                                                                                                                                                                                                                                                                                                                                                                                                                                                                                                                                                                                                                                                                                                                                                                                                                                                                                                                                                                                                                                                                                                                                                                                                                                                                                                                                                                                                                                                                                                                                                                                                                                                                                                                                                                                                                       |
|----------------------------------------------------------------------------------------|---------------------------------------------------------------------------------------------------------------------------------------------------------------------------------------------------------------------------------------------------------------------------------------------------------------------------------------------------------------------------------------------------------------------------------------------------------------------------------------------------------------------------------------------------------------------------------------------------------------------------------------------------------------------------------------------------------------------------------------------------------------------------------------------------------------------------------------------------------------------------------------------------------------------------------------------------------------------------------------------------------------------------------------------------------------------------------------------------------------------------------------------------------------------------------------------------------------------------------------------------------------------------------------------------------------------------------------------------------------------------------------------------------------------------------------------------------------------------------------------------------------------------------------------------------------------------------------------------------------------------------------------------------------------------------------------------------------------------------------------------------------------------------------------------------------------------------------------------------------------------------------------------------------------------------------|
| <p><b>Ongoing barriers (system and staffing)</b></p>                                   | <p><b>System-related:</b></p> <p>“We have the EMR triggering, and we have active tracking of abnormal Paps. But as far as getting people in for their routine screening, I don't believe we have someone actively tracking that. I feel like it's more on the provider picking it up as they open the chart.” (APP, Family Medicine)</p> <p><b>Staffing-related:</b></p> <p>“We are still working with reduced staff in the office. So, there are definitely still much fewer appointments available.” (APP, Family Medicine)</p> <p>“We realized ... we really need to start doing colposcopy again. But unfortunately, that's also when our physician colposcopy provider left.” (MD/DO, Family Medicine)</p> <p>“Rates of burnout, and then the competition from other systems, hiring people away was pretty debilitating at times.” (APP, Family Medicine)</p>                                                                                                                                                                                                                                                                                                                                                                                                                                                                                                                                                                                                                                                                                                                                                                                                                                                                                                                                                                                                                                                                   |
| <p><b>Facilitators and strategies for catching up on cervical cancer screening</b></p> | <p><b>Staffing and tracking:</b></p> <p>“Patients get reminders... the health center as a whole has been trying to run lists of people that are due and bring them in.” (APP, Family Medicine)</p> <p>“If they had an abnormal PAP, the nursing staff would have ticklers [in the EMR] created as a reminder that it's time for the patient to have a PAP... We have two nurses who are dedicated not for just PAP tracking but for general ticklers.” (MD/DO, Internal Medicine).</p> <p><b>HPV self-sampling benefits:</b></p> <p>“It decreases any concerns for like privacy, for discomfort, you know, patients who have trauma histories, maybe patients who are transgender, patients who, you know, like I said, work schedules don't allow them to get in on time, um, it just opens up a way for them to still all be screened in a way that can hopefully feel comfortable and accessible.” (APP, OBGYN/Women’s Health)</p> <p>“I think it could be [useful to address pandemic-related screening deficits]. Especially if we don't have, um, as many in-person appointments available.” (APP, Family Medicine)</p> <p><b>HPV self-sampling concerns:</b></p> <p><u>Inadequate sample:</u></p> <p>“Making sure that people you know, kind of collect it correctly, mostly just because in my experience, people have not great knowledge about their own anatomy sometimes... if somebody accidentally puts the swab in their rectum, instead of the vagina, you would probably get an HPV result, because you can do HPV testing in the rectum, but you're not getting a, a cervical cancer screening.” (APP, OBGYN/Women’s Health)</p> <p><u>Kits will not be returned:</u></p> <p>“We do our –occult blood sampling with home tests, and sometimes –many times, those kits go home and never come back. We're always chasing a patient to kind of get them to bring it back or mail it back.” (APP, Family Medicine)</p> |
